# Supplementary material for: Stretchable and Transparent Metal Nanowire Microelectrodes for Simultaneous Electrophysiology and Optogenetics Applications
Source: MDPI journal article supplement (doi:10.3390/photonics8060220), 2021-06-15
Supplement: s1 [file s1]

Supplementary Materials

**Stretchable and Transparent Metal Nanowire Microelectrodes for Simultaneous Electrophysiology and Optogenetics Applications**

Jinbi Tian, Zexu Lin, Zhiyuan Chen, Sofian N. Obaid, Igor R. Efimov and Luyao Lu\*

Department of Biomedical Engineering  
The George Washington University, Washington, DC 20052, USA  
\*Corresponding Author E-mail: [luyaolu@gwu.edu](mailto:luyaolu@gwu.edu)

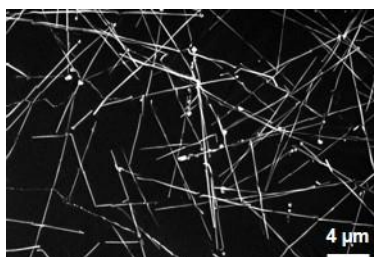

Figure S1. SEM image of the Ag NW structures at 10 mg/mL after 4500 stretching cycles at 40% strain.

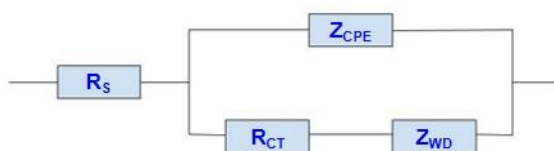

Figure S2. Equivalent circuit model with fitting parameters  $R_s$ ,  $R_{CT}$ ,  $Z_{WD}$ , and  $Z_{CPE}$ .
